# Supplementary material
Source: MDPI journal article supplement (https://www.mdpi.com/2077-1312/10/4/454)
Supplement: s1 [file s1]

Archive with 2 entries (2 files):
- jmse-1616556-supplementary.pdf
- Supplementary Table S1.xls
