# Supplementary material
Source: MDPI journal article supplement (https://www.mdpi.com/2077-1312/10/4/454)
Supplement: s1 [file s1 › jmse-1616556-supplementary.pdf]

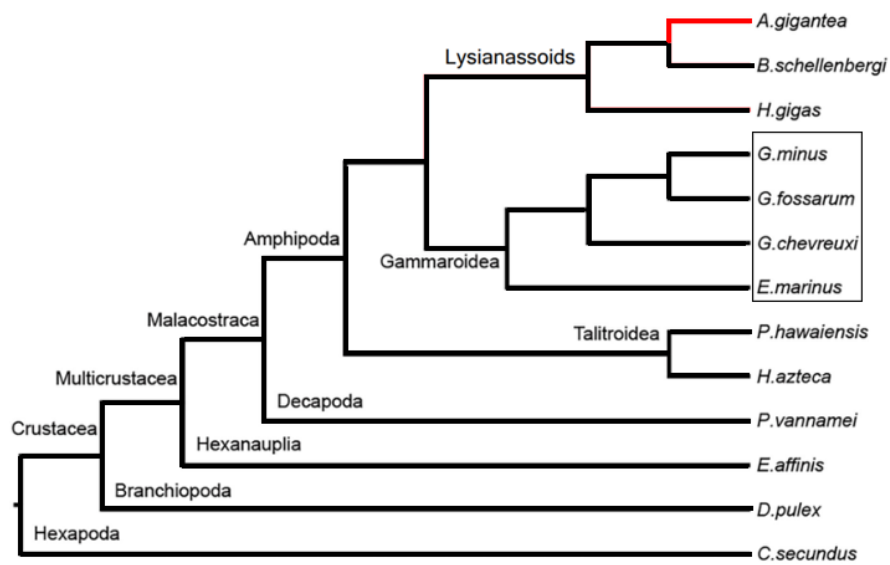

**Figure S1.** The phylogenetic position of the *Hirondellea gigas* and *Alicella gigantea* based on maximum likelihood (ML) estimation of FMO3 gene of selected crustacean species.

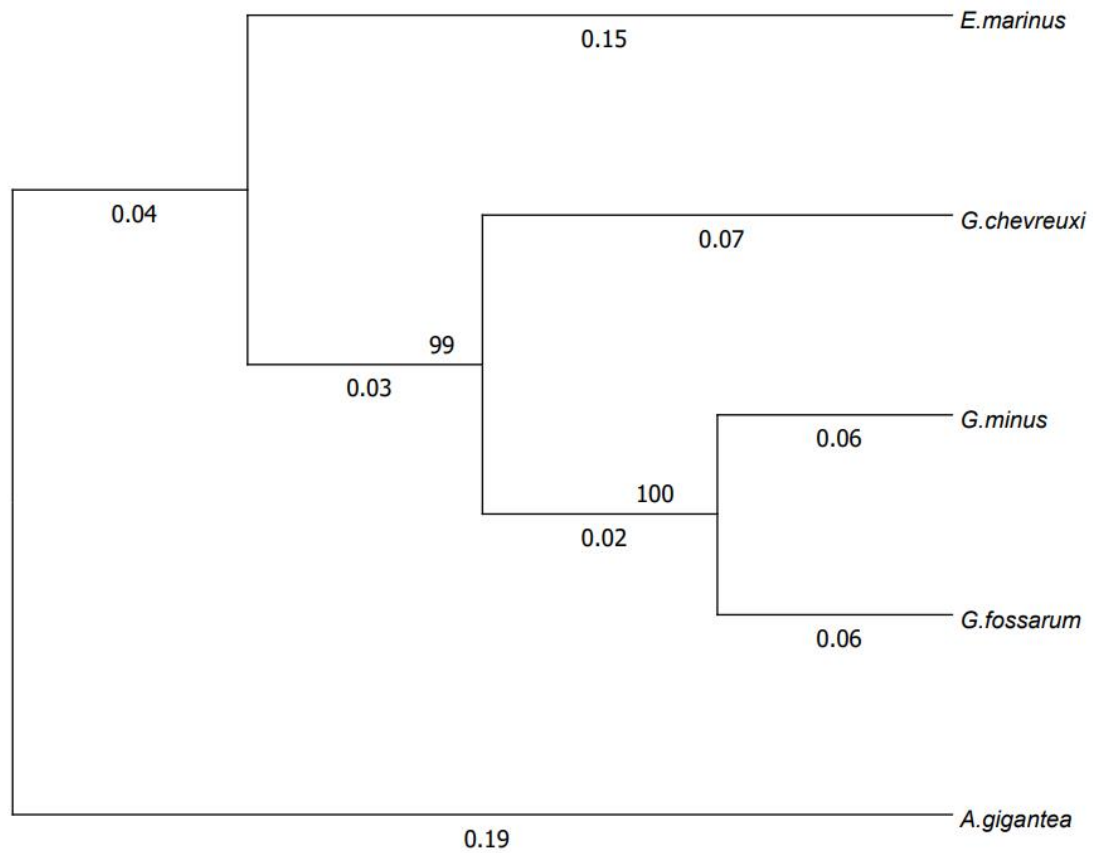

**Figure S2.** Phylogenetic tree of FMO3 with the branch lengths between Gammaroidea and *A. gigantea*.

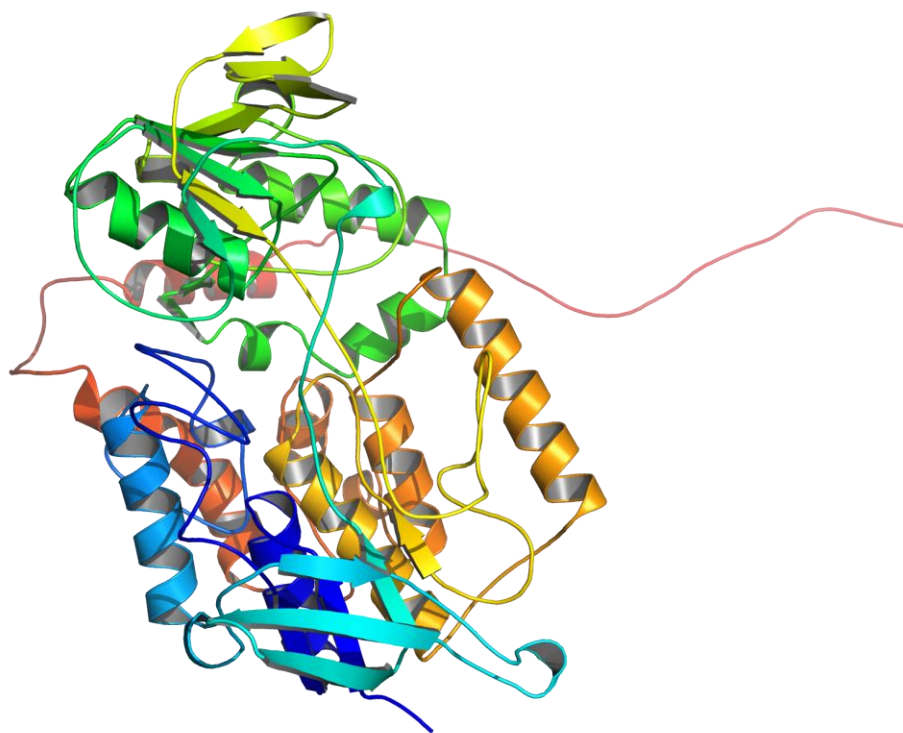

**Figure S3.** The prediction of three-dimensional crystal structure of FMO3 protein of *A. gigantea*.
