# Supplementary material
Source: MDPI journal article supplement (https://www.mdpi.com/2077-1312/10/4/454)
Supplement: s1 [file s1 › Supplementary Table S1.xls]

## Sheet: 2.Branch Site Model
Table S1. The positive selected sites and specific substitution sites on two conserved motifs.
Branch site model (BSM)
Model	np	Ln L	Estimates of parameters					Model compared	LRT P-value	Positive sites
Model A	12	-4815.650959	Site class	0	1	2a	2b	Model A vs.Model A null	1.000000000	9 G 0.511,22 R 0.854,47 I 0.625,49 V 0.878,74 A 0.521,81 K 0.827,82 S 0.593,92 S 0.951*,95 A 0.897,99 Q 0.686,107 N 0.828,112 M 0.866,113 E 0.609,124 V 0.814,128 Q 0.892,130 G 0.540,136 K 0.599,142 Q 0.563,144 S 0.938,146 T 0.894,147 A 0.932,176 V 0.841,186 S 0.942,187 G 0.875,191 K 0.843,214 S 0.862,229 R 0.569,240 L 0.578,248 H 0.536,260 A 0.956*,286 K 0.957*,297 M 0.589,301 N 0.517,322 T 0.842…
			f	0.60407	0.18210	0.16430	0.04953
			ω0	0.03950	1.00000	0.03950	1.00000
			ω1	0.03950	1.00000	1.00000	1.00000
Model A null	11	-4815.650959	1							Not Allowed
